# Supplementary material
Source: HighWire-hosted journal article supplement (doi:10.1101/rna.079290.122)
Supplement: Supplemental_Figure_Table_Legends.docx [file Supplemental_Figure_Table_Legends.docx]

**SUPPLEMENTAL FIGURE 1. Terminal 5′, 2′-phosphates are resistant to T4 RNL1 ligation**. (**A**) Unmodified 20 nt oligo and the 2′-phosphorylated 26 nt oligo used in these experiments. (**B**) One-hour exonuclease digestions of this 26 nt substrate with recombinant Xrn1. All products were run on a 15% TBU acrylamide gel alongside an alkaline hydrolysis ladder of both the 2′-PO4-containing and unmodified 26 nt oligo substrate. In lanes 1-3, overexposure of the alkaline hydrolysis lanes provides clearer visibility of the shift in bands due to lack of hydrolysis at the 2′-phosphorylated position. Xrn1 digestion yields a product of 10-11 nt in lane 8, consistent with digestion to the 2’-phosphorylated nucleotide. (**C**) In a ligation assay, 26 nt oligos were 3´-end labeled with radiolabeled pCp prior to incubation with or without rXrn1. After digestion, all samples were treated with phenol:chloroform and ethanol precipitated, and then mixed with equimolar amounts of the 20 nt oligo, followed by a 1 hour incubation with or without T4 RNL1. Ligation products are visible in lane 2, but undetectable in lane 4.

**SUPPLEMENTAL FIGURE 2. Per-nucleotide base calling "errors" at the *HAC1*s splice junction**. (**A**) Mismatch frequency, (**B**) insertion frequency, (**C**) deletion frequency, and (**D**) read coverage in counts per million for eight direct RNA sequencing libraries. In each plot, the 2′-phosphorylated position is indicated by a dashed line.

**SUPPLEMENTAL FIGURE 3. Detection of 2′-phosphates on intron-containing tRNAs is complicated by the presence of additional tRNA modifications.** (**A**) Cloverleaf diagram of a spliced tRNA from *tpt1∆* cells, indicating the 2′-phosphorylated nucleotide located immediately 3′ of the anticodon, and the 5 mer centered on this position in gray. (**B**) The RNA modification landscape within the indicated 5mer in (**A**) for each intron-containing tRNA in *S. cerevisiae*. Blue boxes indicate positions with known tRNA modifications in the MODOMICS database [(Boccaletto et al. 2022)](https://paperpile.com/c/J8TZ2e/aFx0K). (**C**) The 2′-phosphate on tRNA-Trp-CCA can be detected by northern blotting for 3′-exon in total RNA from RNA repair strains treated with and without recombinant Xrn1 *in vitro*. A 3′-exon degradation intermediate accumulates in *tpt1∆* (10x-tRNA) cells (band 3 in magnified panel at right), as well as two larger exonuclease-resistant bands that are also present, albeit less abundant, in RNA from *trl1∆* (10x-tRNA) cells treated with rXrn1 (band 1 and 2 in magnified panel). The cytoplasmic methyltransferase Trm7 deposits 2′-O-methyl groups at two upstream positions within the anticodon loop of this tRNA after intron removal [(Jiang et al. 1997)](https://paperpile.com/c/J8TZ2e/cQp4) as well as on intronless substrates [(Pintard et al. 2002)](https://paperpile.com/c/J8TZ2e/cP9O), and 2′-O-methyl groups also inhibit Xrn1 [(Whipple et al. 2011)](https://paperpile.com/c/J8TZ2e/tydM7), albeit less robustly than 2′-phosphates (**Fig. 1b**), thus, it is possible that these larger bands are produced by 2′-O-methyl-mediated rXrn1 inhibition. However, in the context of a *trl1∆ tpt1∆* double mutant, these degradation intermediates do not accumulate, raising the possibility of additional crosstalk between tRNA splicing and tRNA modification pathways. In the lower sub-panel, the same membrane has been stripped and reprobed for 5S rRNA as a loading control for use in the densitometry analysis below. (**D**) IGV snapshots of direct tRNA sequencing reads mapping to intron-containing *S. cerevisiae* tRNAs. Each colored bar represents a position with >20% mismatching to the reference base; gray bars indicate positions which did not exceed this threshold. Numbers in brackets at right indicate the Y axis range in read counts, and tRNA anticodons are surrounded by a black box. Modified positions reported in MODOMICS [(Boccaletto et al. 2022)](https://paperpile.com/c/J8TZ2e/aFx0K) are annotated below the reference sequence. To the right of select IGV alignment views are northern blots of total RNA from *S. cerevisiae* strains treated with and without recombinant Xrn1 *in vitro*, using a 3′-exon hybridizing probe.

**SUPPLEMENTAL FIGURE 4.** (**A**) Strategy for generation of a 2′-phosphate containing synthetic RNA oligonucleotide for direct RNA sequencing. Flanking oligos AB and CD were ligated to the 2′-phosphorylated or unmodified central 26 nucleotide oligo via a T4 RNL2 splinted ligation, treated with DNase I to destroy the splint, and gel purified to retain only the full 86 nt product, which was prepared for direct RNA sequencing on nanopore beginning with the RTA adapter ligation step. (**B**) Representation of this synthetic oligonucleotide with the 2′-phosphorylated nucleotide as position 0, within the context of an R9.4 nanopore with a docked motor protein. As the modified nucleotide at position 0 is entering the helicase, the nanopore is sensing positions 11-13 nucleotides downstream within the reader head.

**SUPPLEMENTAL FIGURE 5.** Comparison of direct RNA sequencing signal footprints (base calling quality score, dwell time, current intensity, and mismatch frequency) across analogous windows surrounding the 2′-phosphate on *HAC1*s and the synthetic RNA substrate. Asterisks above the box plots indicate statistically significant differences in the per-nucleotide distribution of signals between modified and unmodified RNA, as calculated by a Kruskal-Wallis test with a *post hoc* Bonferroni correction.

**SUPPLEMENTAL FIGURE 6.** Scatter plot of the difference in mean current intensity vs. difference in mean dwell time for modified and unmodified RNAs across a window extending from 10 nt 5′ of the modified position to 20 nt 3′ of the modified site. Each dot represents an individual position across the window of interest.

**SUPPLEMENTAL FIGURE 7.** Lower stoichiometry modifications can mask signals of 2´-phosphorylation. (**A**) Mean dwell time in milliseconds for 100% unmodified (blue), 100% modified (orange), or an equimolar input of unmodified and 2´-phosphorylated synthetic RNA substrates. The vertical black dashed line indicates the 2´-phosphorylated position (nt 41), and the red dashed line indicates the max increase in dwell time seen on this RNA substrate (nt 52). (**B**) Median dwell times for the same libraries, plotted as in (**A**). (**C**) Distribution of dwell times across the same libraries at nucleotide 52 shows statistically significant differences between all three libraries as determined by a two sample Kolmogorov–Smirnov test. (**D**) Distribution of dwell times between unmodified RNA and the 50/50 mixture of 2´-phosphorylated and unmodified RNA, plotted by position. A Bonferroni-corrected Kruskal-Wallis test of the distribution in dwell times across this window identified statistically significant differences at positions 41, 52, and 57.

**SUPPLEMENTAL FIGURE 8.** Resquiggling may produce unexpected positional discrepancies depending on the software used.(**A**) A reanalysis of direct RNA sequencing of *S. cerevisiae* rRNA from [(Stephenson et al. 2022)](https://paperpile.com/c/J8TZ2e/ccZzx) around the methylated nucleotide at site 2220 (*****) shows a peak in dwell time at the +11 nucleotide position (**^**) rather than +10 nucleotides as previously reported. (**B**) A schematic comparing how the software tools Tombo and Nanopolish annotate positions after resquiggling nanopore data. Note that neither tool outputs positions using one-based counting in nucleotide sequence space (top line); therefore, we surmise the previous analysis of the data in (**A**) began counting at nucleotide zero, accounting for the +1 nucleotide difference between these analyses.

# Supplemental Tables

*See attached xlxs file (1 table per tab)***.**

**SUPPLEMENTAL TABLE 1 -** Library metrics and metadata for biological samples.

**SUPPLEMENTAL TABLE 2 -** Additional metadata and barcodes for multiplexed sequencing runs.

**SUPPLEMENTAL TABLE 3 -** mRNAs with high levels of genotype-specific read termination due to unblocking events in libraries from tunicamycin treated *xrn1∆ tpt1∆* (10x) vs. wild-type cells.

**SUPPLEMENTAL TABLE 4 -** Oligonucleotides used in this study.

**SUPPLEMENTAL TABLE 5 -** Yeast strain numbers and genotypes.

**SUPPLEMENTAL TABLE 6 -** Metadata for files uploaded to SRA.
