# Supplementary material
Source: HighWire-hosted journal article supplement (doi:10.1101/rna.079290.122)
Supplement: Supplemental_Tables_S1-S6.xlsx [file Supplemental_Tables_S1-S6.xlsx]

## Sheet: S1 - Library Metrics
	Library type	Date run	Deep- lexicon Barcode	Genotype	In vivo treat.	In vitro treat.	Total reads	# reads after demulti- plexing	# of aligned reads	% reads aligned (after demux)	Median read length	Mean read length	Mean read quality	Mismatches / bases mapped
	mRNA	2021.12.18	mult.	multiple	n/a	n/a	1716000	1009828	1526776	0.88973	560	690	17.7	0.104549
	mRNA	2021.12.21	mult.	multiple	n/a	n/a	2478774	1356129	2027190	0.81782	508	594	16.8	0.111762
	mRNA	2021.12.18	1	CRY1 (w303)	DMSO	none	519102	341534	326095	0.954795	624	765	18.3	0.0999385
	mRNA	2021.09.29	n/a	CRY1 (w303)	Tm	none	436679	n/a	370940	0.849457	458	509	16.8	0.109023
	mRNA	2021.12.18	3	xrn1∆ (10x)	DMSO	none	382352	214144	198359	0.926288	631	779	17.9	0.103662
	mRNA	2021.12.18	4	xrn1∆ (10x)	Tm	none	545234	365475	345862	0.946336	679	817	18.2	0.100817
	mRNA	2021.12.21	3	tpt1∆ (10x)	DMSO	none	595962	337519	299694	0.887932	572	682	17.3	0.107596
	mRNA	2021.12.21	2	tpt1∆ (10x)	Tm	none	704278	442812	406812	0.918701	634	763	17.6	0.106238
	mRNA	2021.09.08	n/a	xrn1∆ tpt1∆ (10x)	DMSO	none	1970102	n/a	1754889	0.89076	642	758	18.5	0.0925988
	mRNA	2021.08.20	n/a	xrn1∆ tpt1∆ (10x)	Tm	none	282863	n/a	235241	0.831643	581	657	18.1	0.095553
	tRNA	2021.12.23	n/a	CRY1 (w303)	none	none	74347	n/a	29306	0.394179	114	132	10.6	0.255508
	tRNA	2021.12.24	n/a	w303 (10x)	none	none	85443	n/a	43203	0.505635	116	138	10.4	0.253019
	tRNA	2021.12.24	n/a	tpt1∆ (10x)	none	none	43886	n/a	19478	0.443832	113	130	10.2	0.254943
	tRNA	2021.12.08	n/a	xrn1∆ (10x)	none	none	95284	n/a	38052	0.399354	116	129	10.6	0.248617
	tRNA	2021.11.27	n/a	xrn1∆ tpt1∆ (10x)	none	none	40000	n/a	10578	0.26445	105	110	10.7	0.228596
	mRNA	2021.09.28	n/a	CRY1 (w303)	DMSO	Xrn1	1208126	n/a	1079475	0.893512	313	380	17.8	0.0949824
	mRNA	2021.09.27	n/a	CRY1 (w303)	Tm	Xrn1	1786157	n/a	1659980	0.929358	432	504	18.2	0.0909251
	mRNA	2021.08.17	n/a	xrn1∆ tpt1∆ (10x)	DMSO	Xrn1	266760	n/a	241223	0.90427	650	777	19.1	0.0845048
	mRNA	2021.08.19	n/a	xrn1∆ tpt1∆ (10x)	Tm	Xrn1	1113881	n/a	953937	0.856408	519	610	18.8	0.0866903
		*mult. = multiplex run, see table S2			*Tm = tunicamycin

## Sheet: S2 - Multiplexed Run Info
run_id	genotype	treatment	exonuclease	barcode
e079fe8252d647805e05c6112d908b531058fbe1	w303	DMSO	none	bc_1
e079fe8252d647805e05c6112d908b531058fbe1	xrn1	DMSO	none	bc_3
e079fe8252d647805e05c6112d908b531058fbe1	xrn1	tunicamycin	none	bc_4
9726ae9d655c7f4a0c0399bfd2fe9b10369b5cf4	w303	DMSO	none	bc_1
9726ae9d655c7f4a0c0399bfd2fe9b10369b5cf4	xrn1	DMSO	none	bc_3
9726ae9d655c7f4a0c0399bfd2fe9b10369b5cf4	xrn1	tunicamycin	none	bc_4
ff7f9018cf786a4d7b3c4a173b6bd7179bd9f8c5	tpt1	tunicamycin	none	bc_2
ff7f9018cf786a4d7b3c4a173b6bd7179bd9f8c5	tpt1	DMSO	none	bc_3

## Sheet: S3 - mRNAs with high unblocking
Standard Name	Systematic Name	Mutant % unblock	Wild-type % unblock	MT - WT %
YOR361C	PRT1	36.5854	2.66667	33.9187
YER133W	GLC7	32.2581	3.33333	28.9247
YJL143W	TIM17	31.8182	3.27869	28.5395
YPR191W	QCR2	31.5069	4.16667	27.3402
YBR160W	CDC28	31.1111	4	27.1111
YDR046C	BAP3	26.9231	1.28205	25.641
YOR117W	RPT5	26.3158	2.1978	24.118
YBL047C	EDE1	29.6296	6.25	23.3796
YKL104C	GFA1	25.6098	2.36407	23.2457
YGL062W	PYC1	22.5	0.934579	21.5654
YJR145C	RPS4A	25.1656	3.61446	21.5511
YBL058W	SHP1	23.6842	2.22222	21.462
YER133W	GLC7	30.303	9.09091	21.2121
YHR094C	HXT1	22.2222	1.90114	20.3211
YLR120C	YPS1	20.9302	1.17647	19.7538
YDR516C	EMI2	22.2222	2.5974	19.6248
YOL011W	PLB3	22.5	3.27869	19.2213
YMR092C	AIP1	21.2121	2.0202	19.1919
YNL079C	TPM1	24.5614	5.45455	19.1069
YLR257W	YLR257W	19.7917	0.840336	18.9513
YPL145C	KES1	21.0526	2.85714	18.1955
YNR065C	YNR065C	22.2222	4.12371	18.0985
YJL139C	YUR1	21.6667	4	17.6667
YFL031W	HAC1	19.5876	1.97044	17.6172
YML007W	YAP1	22.7273	5.17241	17.5549
YJR145C	RPS4A	19.8895	2.38095	17.5085
YDR226W	ADK1	20	2.99145	17.0085
YPL232W	SSO1	21.6216	4.65116	16.9705
YPL274W	SAM3	20.5882	3.7037	16.8845
YOR232W	MGE1	21.2121	4.44444	16.7677
YGL022W	STT3	19.0476	2.5	16.5476
YDL095W	PMT1	17.0732	0.714286	16.3589
YOR151C	RPB2	20.4546	4.34783	16.1067
YOR317W	FAA1	20.4082	4.70588	15.7023
YBR159W	IFA38	16.4179	0.847458	15.5704
YKL210W	UBA1	17.0732	1.7094	15.3638
YDL126C	CDC48	17.6471	2.29008	15.357
YKL164C	PIR1	25.5814	10.2564	15.325
YKR001C	VPS1	16.6667	1.35135	15.3153
YDR214W	AHA1	17.2414	1.9802	15.2612
YKR013W	PRY2	17.3077	2.1097	15.198
YDR394W	RPT3	18	2.85714	15.1429
YAR002C-A	ERP1	16.9231	2.43902	14.484
YDR077W	SED1	15.3233	1.07004	14.2533
YNR050C	LYS9	16	1.85185	14.1481
YFL031W	HAC1	15.9509	2.0794	13.8715

## Sheet: S4 - oligonucleotides
Oligo name	Oligonucleotide sequence (5′→3′)
Pro-UGG 3 ́-exon northern probe	GGGGCGAGCTGGGAATTGAACCCAGGGCCTCTCGCA
Tyr-GUA 3 ́-exon northern probe	TCTCCCGGGGGCGAGTCGAA
Phe-GAA 3 ́-exon northern probe	TGCGAATTCTGTGGATCGAACACAGG
Trp-CCA 3 ́-exon northern probe	TGAAACGGACAGGAATTGAA
5S rRNA northern probe	CTGGTAGATATGGCCGCAACC
26 nt control RNA oligo	[5Phos]-AAUUGGUUCUUUUAAGUCCUCAGACG
26 nt 2´-phosphorylated RNA oligo	[5Phos]-AAUUGGUUCUUUUAA[2PhosG]GUCCUCAGACG
AB RNA oligo	GGAUUCGUCCGCUCAUGAUAUGACA
CD RNA oligo	[5Phos]-CCGUAUGGGCGUGUUGCAAUCUCGUAAAAAAAAAA
86 nt DNA splint	TTTTTTTTTTACGAGATTGCAACACGCCCATACGGCGTCTGAGGACTTAAAAGAACCAATTTGTCATATCATGAGCGGACGAATCC
20 nt control RNA oligo	GGCUUCGCAGUCCUUAGAAG

## Sheet: S5 - yeast strains
Strain ID	Genotype	Source
YJH682	wild-type w303 (CRY1)	Mingxia Huang
YJH932	(pAG424-10x-tRNA)
YJH632	xrn1∆::HygMX
YJH834	tpt1∆::LEU2 (pAG424-10x-tRNA)
YJH902	tpt1∆::LEU2 xrn1∆::HygMX (pAG424-10x-tRNA)
YJH835	trl1∆::KanMX (pAG424-10x-tRNA)
YJH927	trl1∆::KanMX tpt1∆::LEU2 (pAG424-10x-tRNA)

## Sheet: S6 - SRA files
sample_name	library_ID	title	library_strategy	library_source	library_selection	platform	instrument_model	design_description	filename	filename2
w303 DMSO	w303 DMSO mRNA NoExo	Direct RNA-seq of yeast and synthetic RNAs by nanopore	ssRNA-seq	TRANSCRIPTOMIC	Oligo-dT	OXFORD_NANOPORE	MinION	500 ng of poly(A) selected total RNA input into ONT SQK-RNA002 protocol	20211218_FAQ63710_13863d56_mplex_bc1_95pct.w303DMSOmRNA.fastq.gz	20211218_FAQ63710_13863d56_mplex.fast5.tar.gz
w303 tunicamycin	w303 Tm mRNA NoExo	Direct RNA-seq of yeast and synthetic RNAs by nanopore	ssRNA-seq	TRANSCRIPTOMIC	Oligo-dT	OXFORD_NANOPORE	MinION	500 ng of poly(A) selected total RNA input into ONT SQK-RNA002 protocol	20210929_FAQ63680_db29d96b_w303TmNoExomRNA.fastq.gz	20210929_FAQ63680_db29d96b_w303TmNoExomRNA.fast5.tar.gz
xrn1 DMSO	xrn1 DMSO mRNA NoExo	Direct RNA-seq of yeast and synthetic RNAs by nanopore	ssRNA-seq	TRANSCRIPTOMIC	Oligo-dT	OXFORD_NANOPORE	MinION	500 ng of poly(A) selected total RNA input into ONT SQK-RNA002 protocol	20211218_FAQ63710_13863d56_mplex_bc3_95pct.xrn1DMSOmRNA.fastq.gz	20210929_FAQ63680_db29d96b_w303TmNoExomRNA.fast5.tar.gz
xrn1 tunicamycin	xrn1 Tm mRNA NoExo	Direct RNA-seq of yeast and synthetic RNAs by nanopore	ssRNA-seq	TRANSCRIPTOMIC	Oligo-dT	OXFORD_NANOPORE	MinION	500 ng of poly(A) selected total RNA input into ONT SQK-RNA002 protocol	20211218_FAQ63710_13863d56_mplex_bc4_95pct.xrn1TmmRNA.fastq.gz	20210929_FAQ63680_db29d96b_w303TmNoExomRNA.fast5.tar.gz
tpt1 DMSO	tpt1 DMSO mRNA NoExo	Direct RNA-seq of yeast and synthetic RNAs by nanopore	ssRNA-seq	TRANSCRIPTOMIC	Oligo-dT	OXFORD_NANOPORE	MinION	500 ng of poly(A) selected total RNA input into ONT SQK-RNA002 protocol	20211221_FAQ65618_b90af2c2_mplex_bc3_95pct.tpt1DMSOmRNA.fastq.gz	20211221_FAQ65618_b90af2c2_mplex.fast5.tar.gz
tpt1 tunicamycin	tpt1Tm mRNA NoExo	Direct RNA-seq of yeast and synthetic RNAs by nanopore	ssRNA-seq	TRANSCRIPTOMIC	Oligo-dT	OXFORD_NANOPORE	MinION	500 ng of poly(A) selected total RNA input into ONT SQK-RNA002 protocol	20211221_FAQ65618_b90af2c2_mplex_bc2_95pct.tpt1TmmRNA.fastq.gz	20211221_FAQ65618_b90af2c2_mplex.fast5.tar.gz
xrn1 tpt1 DMSO	xrn1 tpt1 DMSO NoExo	Direct RNA-seq of yeast and synthetic RNAs by nanopore	ssRNA-seq	TRANSCRIPTOMIC	Oligo-dT	OXFORD_NANOPORE	MinION	500 ng of poly(A) selected total RNA input into ONT SQK-RNA002 protocol	20210908_FAQ65006_7697a790_xrn1tpt1DMSONoExo.fastq.gz	20210908_FAQ65006_7697a790_xrn1tpt1DMSONoExo.fast5.tar.gz
xrn1 tpt1 tunicamycin	xrn1 tpt1 Tm NoExo	Direct RNA-seq of yeast and synthetic RNAs by nanopore	ssRNA-seq	TRANSCRIPTOMIC	Oligo-dT	OXFORD_NANOPORE	MinION	500 ng of poly(A) selected total RNA input into ONT SQK-RNA002 protocol	20210820_FAQ65532_8e05eef6_xrn1tpt1TmNoExomRNA.fastq.gz	20210820_FAQ65532_8e05eef6_xrn1tpt1TmNoExomRNA.fast5.tar.gz
w303 DMSO	w303 tRNA	Direct RNA-seq of yeast and synthetic RNAs by nanopore	ssRNA-seq	TRANSCRIPTOMIC	other	OXFORD_NANOPORE	MinION	500 ng of custom adapter-ligated tRNA used as input without cDNA synthesis	20211223_FAQ63730_1e623db7_w303tRNA.fastq.gz	20211223_FAQ63730_1e623db7_w303tRNA.fast5.tar.gz
w303 10x DMSO	w30310x tRNA	Direct RNA-seq of yeast and synthetic RNAs by nanopore	ssRNA-seq	TRANSCRIPTOMIC	other	OXFORD_NANOPORE	MinION	500 ng of custom adapter-ligated tRNA used as input without cDNA synthesis	20211223_FAQ63730_832c8001_w30310xtRNA.fastq.gz	20211223_FAQ63730_832c8001_w30310xtRNA.fast5.tar.gz
tpt1 DMSO	tpt1 tRNA	Direct RNA-seq of yeast and synthetic RNAs by nanopore	ssRNA-seq	TRANSCRIPTOMIC	other	OXFORD_NANOPORE	MinION	500 ng of custom adapter-ligated tRNA used as input without cDNA synthesis	20211224_FAQ63690_1e73e2c4_tpt1tRNA.fastq.gz	20211224_FAQ63690_1e73e2c4_tpt1tRNA.fast5.tar.gz
xrn1 DMSO	xrn1 tRNA	Direct RNA-seq of yeast and synthetic RNAs by nanopore	ssRNA-seq	TRANSCRIPTOMIC	other	OXFORD_NANOPORE	MinION	500 ng of custom adapter-ligated tRNA used as input without cDNA synthesis	20211208_FAQ63690_3c7cf4f6_xrn1tRNA.fastq.gz	20211208_FAQ63690_3c7cf4f6_xrn1tRNA.fast5.tar.gz
xrn1 tpt1 DMSO	xrn1 tpt1 tRNA	Direct RNA-seq of yeast and synthetic RNAs by nanopore	ssRNA-seq	TRANSCRIPTOMIC	other	OXFORD_NANOPORE	MinION	500 ng of custom adapter-ligated tRNA used as input without cDNA synthesis	20211127_FAQ63752_327aeda2_xrn1tpt1tRNA.fastq.gz	20211127_FAQ63752_327aeda2_xrn1tpt1tRNA.fast5.tar.gz
w303 DMSO	w303 DMSO mRNA rXrn1	Direct RNA-seq of yeast and synthetic RNAs by nanopore	ssRNA-seq	TRANSCRIPTOMIC	other	OXFORD_NANOPORE	MinION	500 ng of decapped and rXrn1-degraded, poly(A) selected total RNA input into ONT SQK-RNA002 protocol	20210928_FAQ63680_7df3566c_w303DMSOXrn1.fastq.gz	20210928_FAQ63680_7df3566c_w303DMSOXrn1.fast5.tar.gz
w303 tunicamycin	w303 Tm mRNA rXrn1	Direct RNA-seq of yeast and synthetic RNAs by nanopore	ssRNA-seq	TRANSCRIPTOMIC	other	OXFORD_NANOPORE	MinION	500 ng of decapped and rXrn1-degraded, poly(A) selected total RNA input into ONT SQK-RNA002 protocol	20210927_FAQ63680_fdd56289_w303TmXrn1.fastq.gz	20210927_FAQ63680_fdd56289_w303TmXrn1.fast5.tar.gz
xrn1 tpt1 DMSO	xrn1 tpt1 DMSO mRNA rXrn1	Direct RNA-seq of yeast and synthetic RNAs by nanopore	ssRNA-seq	TRANSCRIPTOMIC	other	OXFORD_NANOPORE	MinION	500 ng of decapped and rXrn1-degraded, poly(A) selected total RNA input into ONT SQK-RNA002 protocol	20210817_FAQ59871_3aa7b493_xrn1tpt1DMSOXrn1.fastq.gz	20210817_FAQ59871_3aa7b493_xrn1tpt1DMSOXrn1.fast5.tar.gz
xrn1 tpt1 tunicamycin	xrn1 tpt1 Tm mRNA rXrn1	Direct RNA-seq of yeast and synthetic RNAs by nanopore	ssRNA-seq	TRANSCRIPTOMIC	other	OXFORD_NANOPORE	MinION	500 ng of decapped and rXrn1-degraded, poly(A) selected total RNA input into ONT SQK-RNA002 protocol	20210819_FAQ65532_6a154cf8_xrn1tpt1TmXrn1.fastq.gz	20210819_FAQ65532_6a154cf8_xrn1tpt1TmXrn1.fast5.tar.gz
Synthetic control	ctrl splint	Direct RNA-seq of yeast and synthetic RNAs by nanopore	ssRNA-seq	SYNTHETIC	other	OXFORD_NANOPORE	MinION	Splint-ligated and gel purified synthetic RNAs used as input for ONT SQK-RNA002 protocol	20220329_FAQ63629_4c5701ca_ctrlsplint.fastq.gz	20220329_FAQ63629_4c5701ca_ctrlsplint.fast5.tar.gz
Synthetic 2P	2P splint	Direct RNA-seq of yeast and synthetic RNAs by nanopore	ssRNA-seq	SYNTHETIC	other	OXFORD_NANOPORE	MinION	Splint-ligated and gel purified synthetic RNAs used as input for ONT SQK-RNA002 protocol	20220331_FAS38233_f6bef5e1_2Psplint.fastq.gz	20220331_FAS38233_f6bef5e1_2Psplint.fast5.tar.gz
